# Supplementary material for: Arrows in Biology: Lack of Clarity and Consistency Points to Confusion for Learners
Source: Atypon-hosted journal article supplement (doi:10.1187/cbe.17-04-0069), 2018-01-20
Supplement: combinedsupmats.pdf [file combinedsupmats.pdf]

# Supplemental Material

*CBE—Life Sciences Education*

Wright *et al.*

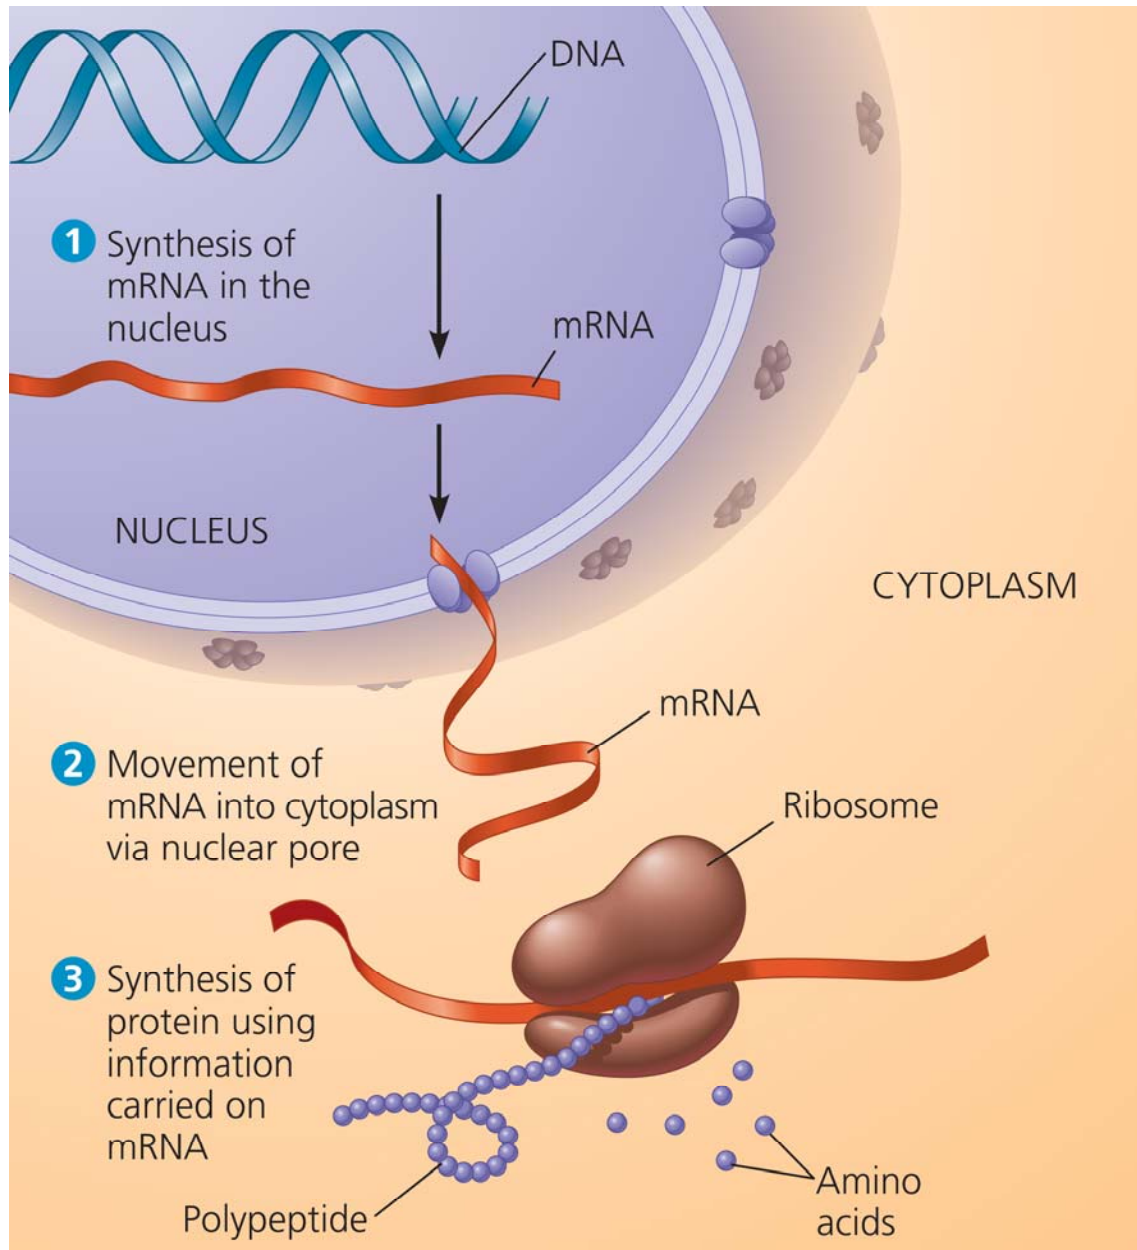

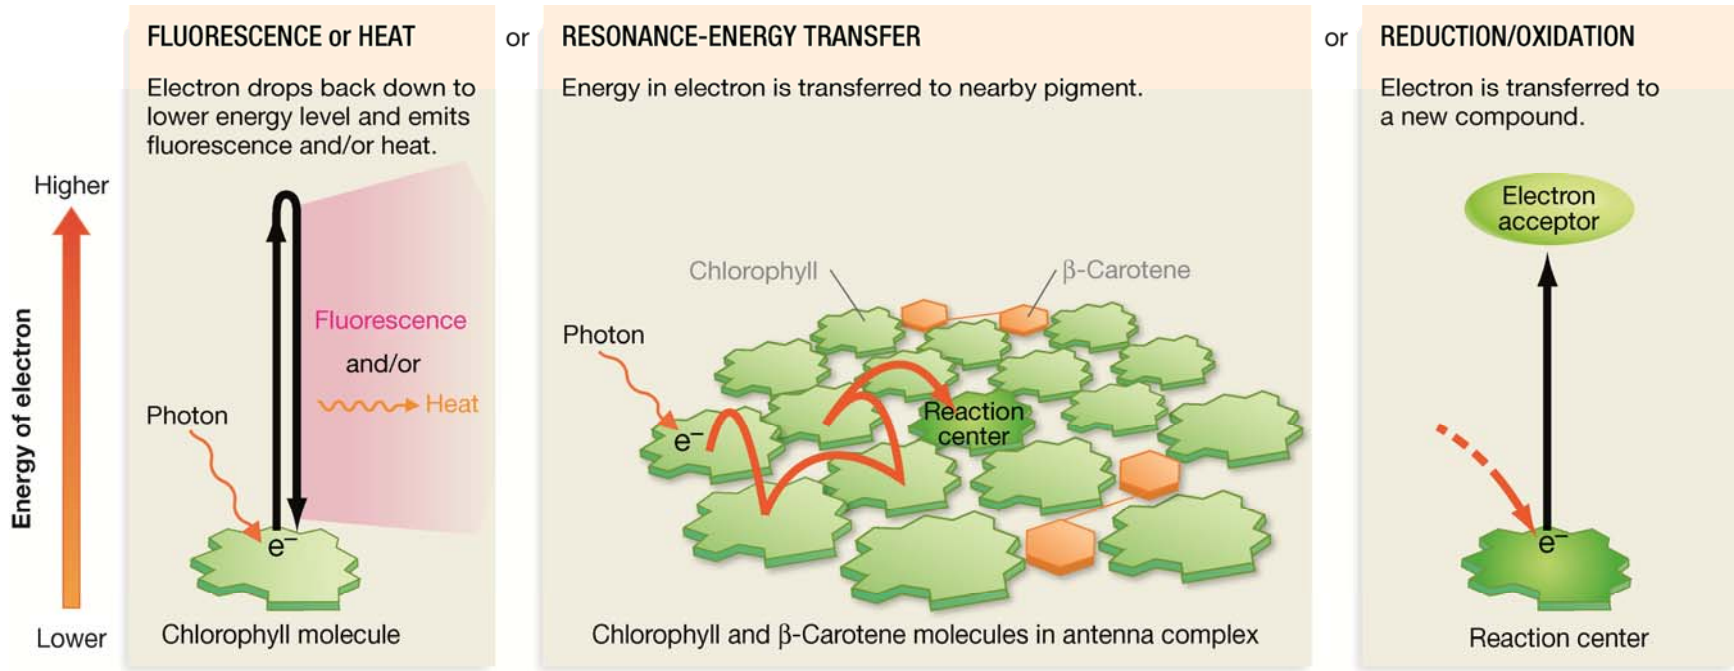

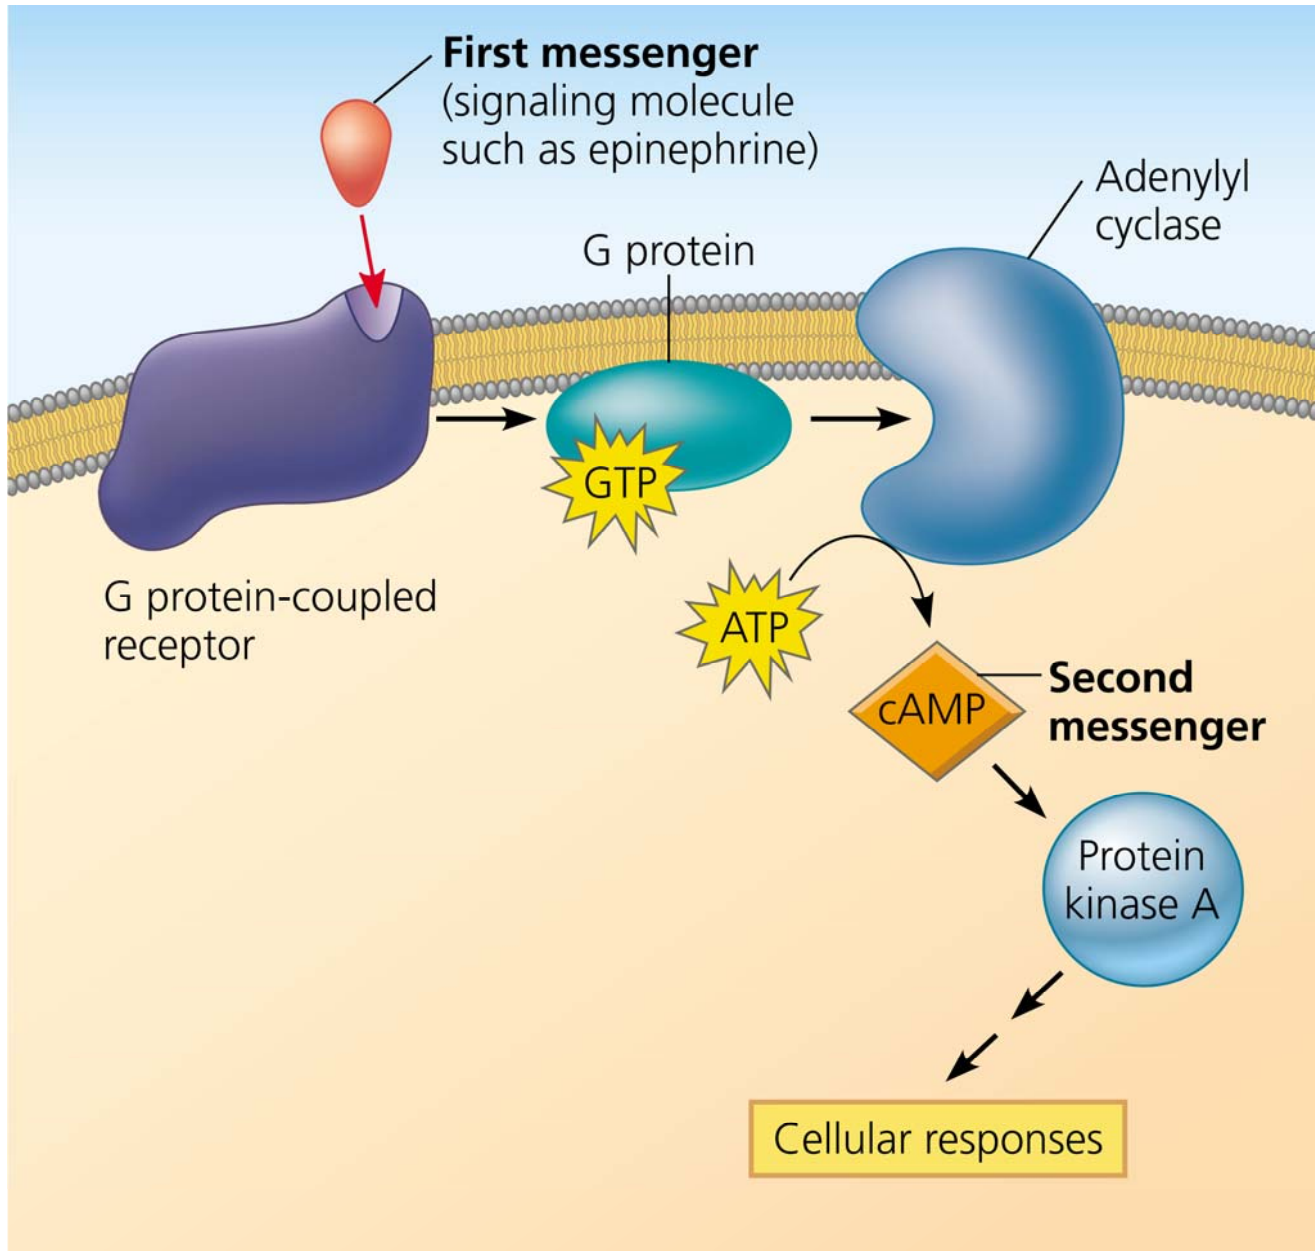

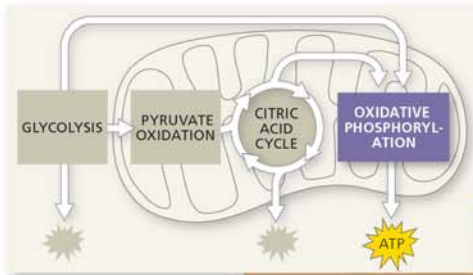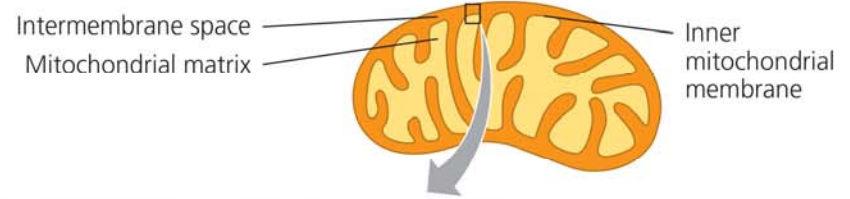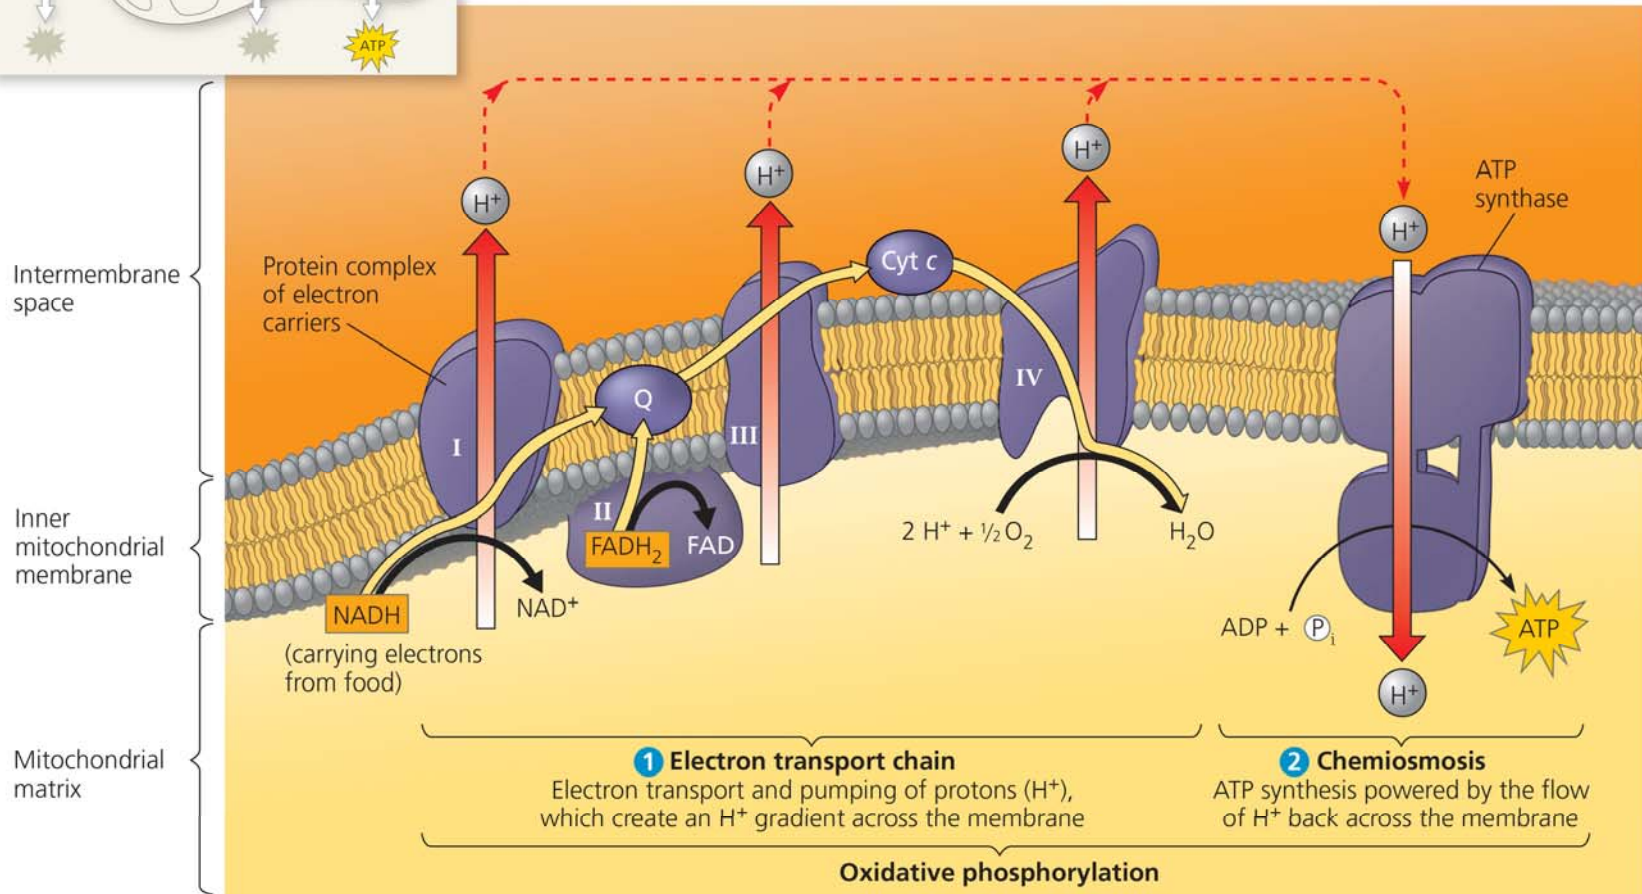



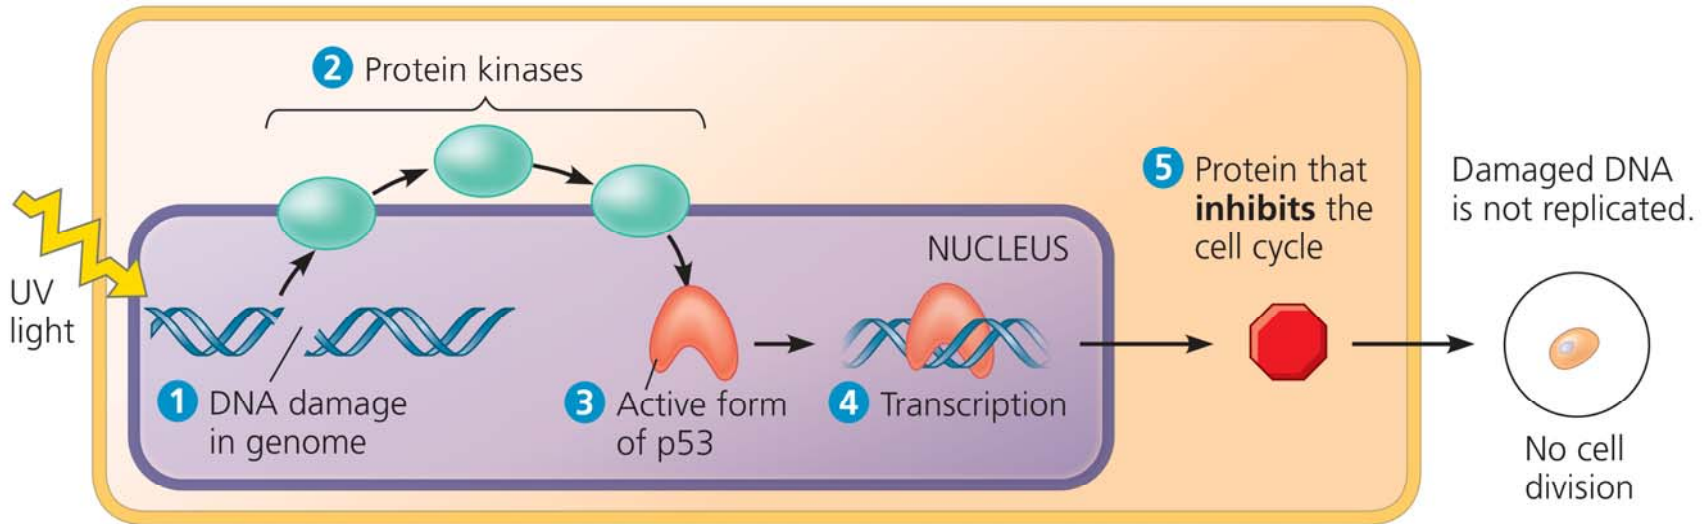

(a) Normal cell cycle-inhibiting pathway

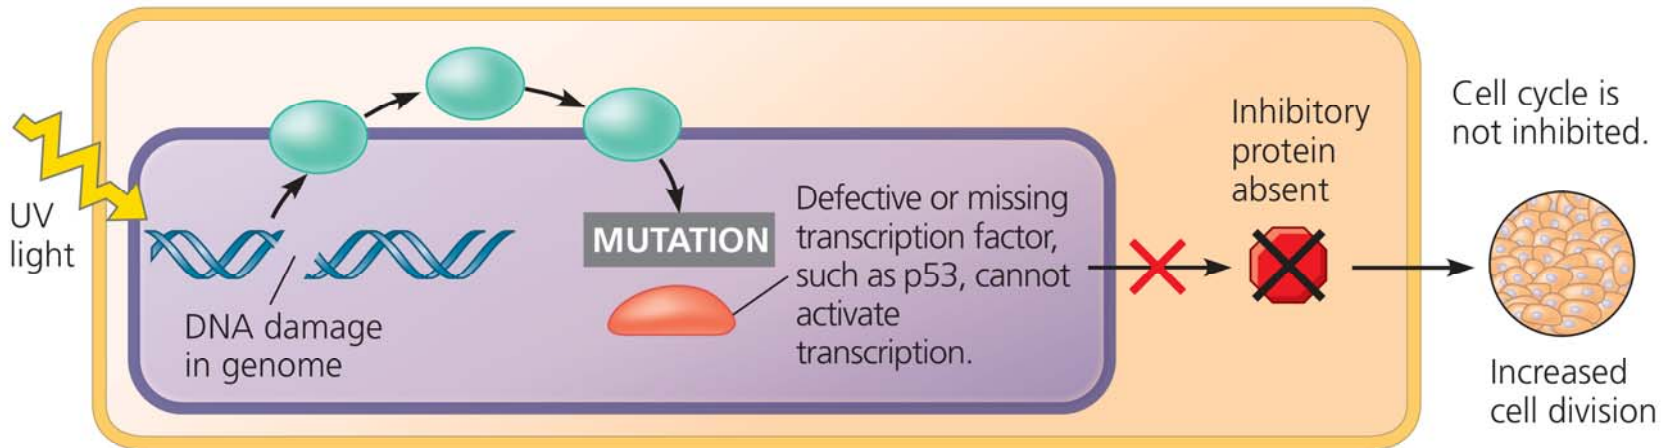

(b) Mutant cell cycle-inhibiting pathway

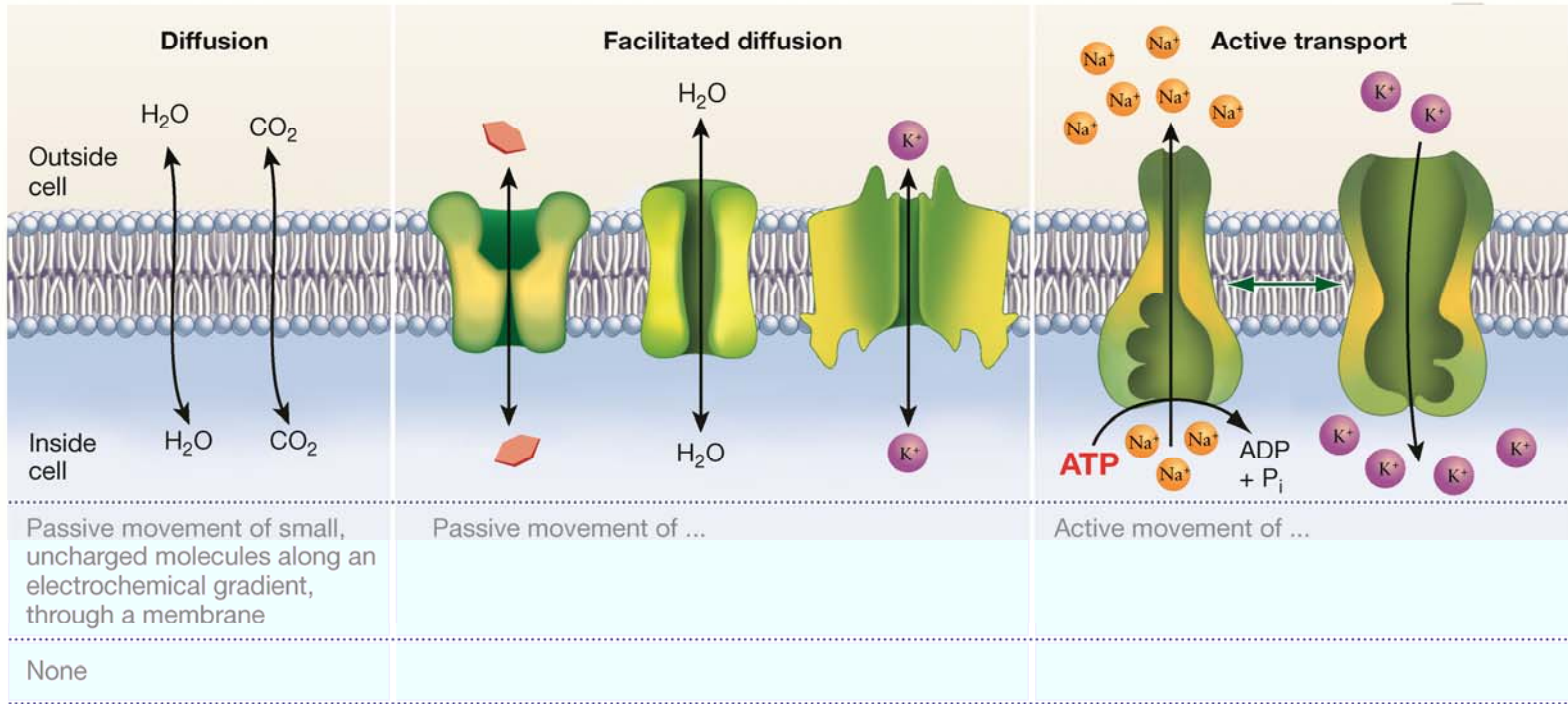

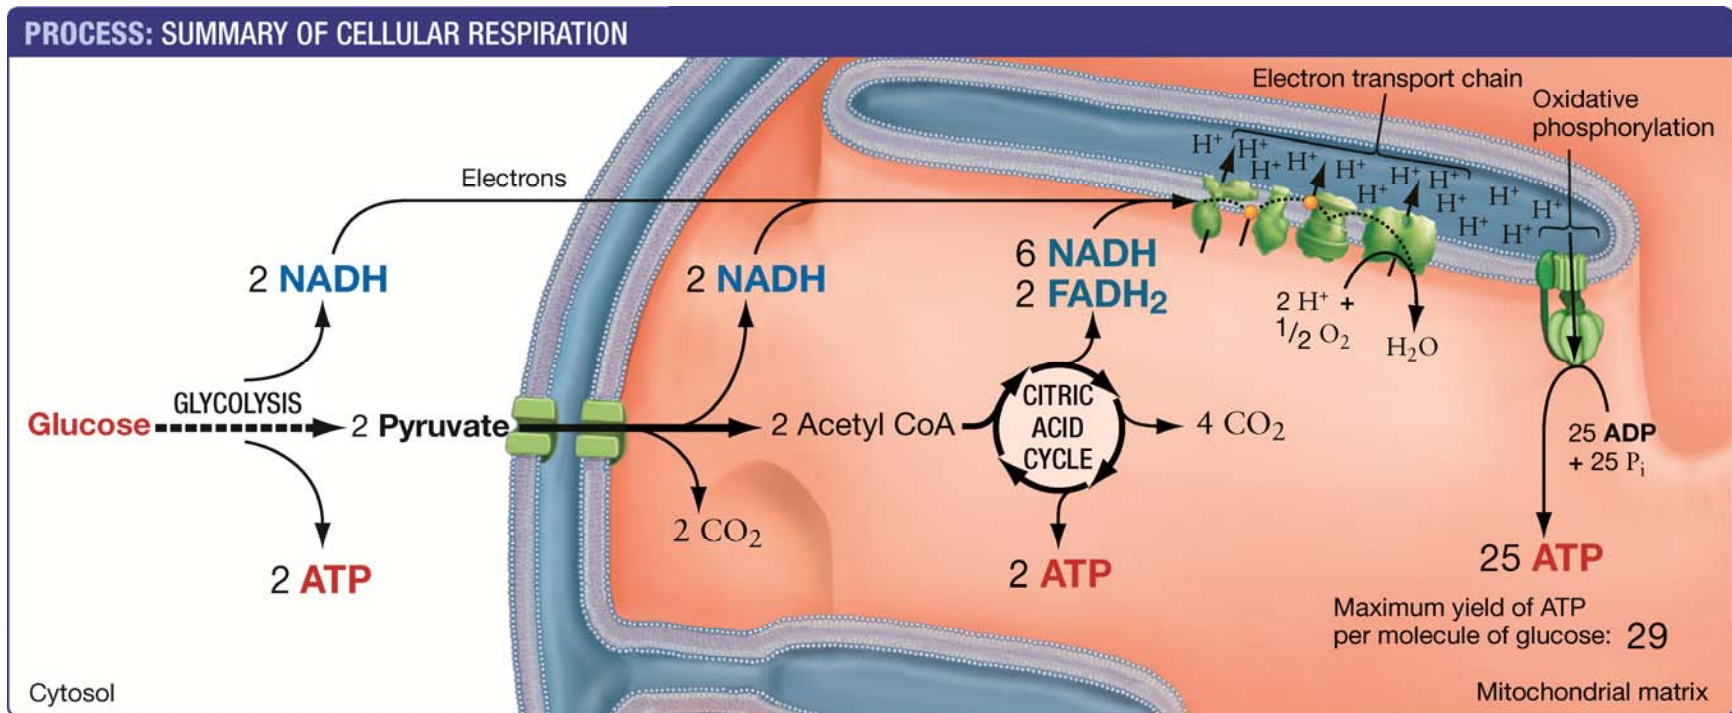

**Supplemental Figure 1. Textbook figures that were used during interviews with undergraduate students.** All images are reprinted with permission from Pearson Higher Ed. Images A-D came from *Campbell Biology in Focus*, 2<sup>nd</sup> ed. (Urry et al., 2016). Images E-G came from *Biological Sciences*, 5<sup>th</sup> ed. (Freeman et al., 2014). **A)** Figure 3.26. Gene Expression: DNA → RNA → Protein. (Numbered steps were removed from the figure for interviews) **B)** Figure 5.25. cAMP as a second messenger in a G protein signalling pathway. **C)** Figure 7.14. Chemiosmosis couples the electron transport chain to ATP synthesis. (Numbered descriptions were removed, though their labels were kept. The corresponding numbers were removed from the figure legend as well). **D)** Figure 16.19. Normal and mutant cell-cycle inhibiting pathway (Panels a and b were used during interviews and the numbers signifying certain steps were removed). **E)** Figure 6.26. Summary of the Active and Passive Membrane Transport (only the third panel was used during interviews). **F)** Figure 9.19. ATP Yield during Cellular Respiration. **G)** Figure 10.10. Four Fates for Excited Electrons in Photosynthetic Pigments.



**Supplemental Table 1. Arrow codebook, showing how 73 very specific codes were collapsed into 12 broad conceptual meaning categories.**

| <b>New Category</b>  | <b>Original Category</b>                           | <b>Meaning</b>                                                                                                                                |
|----------------------|----------------------------------------------------|-----------------------------------------------------------------------------------------------------------------------------------------------|
| change over time     | Passage of Time                                    | Indication of time passing                                                                                                                    |
|                      | Change in value                                    | Indication that something has increased or decreased (e.g. body weight, tissue mass)                                                          |
|                      | Causation                                          | Indication that some sort of cause and effect is taking place. (e.g. high glucose causes inactive adenylly cyclase)                           |
|                      | Evolutionary Progression                           | Indication of the next stage of evolution                                                                                                     |
|                      | Secondary Endosymbiosis within a Phylogeny         | The tail of the arrow indicates the engulfed and the point of the arrow indicates which ancestor was the engulfer for secondary endosymbiosis |
| change over distance | Gradient                                           | Arrows that indicate some sort of gradient from either from high to low or vice versa                                                         |
|                      | Migration                                          | Indication of the possible path that animals migrated from one location to another                                                            |
| flow of information  | Allele Transmission                                | The arrow indicates passing/transmitting a particular allele                                                                                  |
|                      | Combination of Gametic Chromosomes (Fertilization) | Indication of two gametes that are depicted with chromosomes fusing to produce a fertilized egg that also show the chromosomes                |
|                      | Results of a cross at phenotypic level             | Two different organisms that have two different phenotypes mate and produce offspring with different phenotypes                               |
|                      | Generation Advancement                             | Indication of the advancement of a generation from parent to offspring                                                                        |
|                      | Independent Assortment of Alleles in Gametes       | The arrow represents one way a gamete can have different alleles (ex. RrYy -> RY, Ry, rY, ry)                                                 |
|                      | Crossing Over                                      | Indication of crossing over or possibility of crossing over                                                                                   |

|                                 |                                          |                                                                                                                                                                                                              |
|---------------------------------|------------------------------------------|--------------------------------------------------------------------------------------------------------------------------------------------------------------------------------------------------------------|
|                                 | Gene Regulation/Interaction              | The tail of the arrow indicates the gene that regulates and/or interacts with the point of the arrow                                                                                                         |
|                                 | Lateral Gene Transfer within a Phylogeny | The arrow indicates that lateral gene transfer occurred within a phylogenetic tree. The tail of the arrow indicates the species that transferred some of its genes to the species at the point of the arrow. |
| energy or matter transformation | Act of reacting                          | The substance at the tail of the arrow will react with the substance at the point of the arrow. Point of the arrow is not the product!                                                                       |
|                                 | Chemical Reaction                        | The traditional chemistry reaction arrow (reactants --> products)                                                                                                                                            |
|                                 | Mechanism of Chemical Reaction           | indicates the parts of molecules that react, e.g. nucleophilic attack                                                                                                                                        |
|                                 | Production of a Product (reaction)       | The reactant(s) is/are at the tail and the point is the product (macromolecules or words or pictures, not chemistry representation)                                                                          |
|                                 | Alternative Pathways                     | Indication of a substance that can be used/altered in different ways                                                                                                                                         |
|                                 | Multiple Steps in a Pathway              | Indication that there are multiple steps occurring one after another in a pathway without showing the intermediates                                                                                          |
|                                 | Side Product of a Pathway                | A product that is produced and leaves the pathway, but is not the "main" product according to the figure.                                                                                                    |
|                                 | Step in a Pathway                        | The arrow indicates the next step in a pathway                                                                                                                                                               |
|                                 | Step in a Process                        | Indication of the next step in a detailed process. Within the figure, the detailed intermediates are shown, so it is not just reactants and then the final product                                           |
|                                 | Phosphorylation                          | A substance that gains a phosphate group                                                                                                                                                                     |
|                                 | Dephosphorylation                        | A substance loses a phosphate group                                                                                                                                                                          |
|                                 |                                          | Dissociation of a Molecule                                                                                                                                                                                   |

|             |                                   |                                                                                                                                                                                           |
|-------------|-----------------------------------|-------------------------------------------------------------------------------------------------------------------------------------------------------------------------------------------|
|             | Energy Flow/Transfer              | Indicates energy moving/transferring from one entity to another                                                                                                                           |
|             | Protein Shape Change              | The arrow indicates that a protein will change its shape                                                                                                                                  |
| movement    | Movement of a Substance           | Indication that a substance is moving in the direction of the arrow. Substance in this definition includes blood, water, macromolecules                                                   |
|             | Movement of an Electron           | The arrow indicates that electrons are moving from one place to another                                                                                                                   |
|             | Movement of an Object             | Indication of the direction that an object is moving. Object in this definition means that it is big enough to see with our naked eye                                                     |
|             | Movement of Ions                  | Indication of the direction that ions are moving                                                                                                                                          |
|             | Diffusion Equilibrium             | Indication of solutes in equilibrium through diffusion                                                                                                                                    |
|             | Rejection of Object/Substance     | The arrow indicates that the object/substance is refused entry and "bounces off"                                                                                                          |
|             | Osmosis                           | Arrow indicates that water is moving from low solute concentration to high solute concentration or at equilibrium if water potentials are the same                                        |
|             | Gain Metabolic Water              | Indication that metabolic water is gained in a system (e.g. H <sub>2</sub> O produced as a result of metabolic pathways)                                                                  |
|             | indication of a quantity or point | Graph Axes                                                                                                                                                                                |
| Measurement |                                   | The arrow indicates a numerical length associated with it. Can be explicitly stated, with a variable, or indirectly using the figure (ex. Y-axis has numbers and can estimate the number) |
| Zone        |                                   | Indication of different zones/layers/range in a figure that does not indicate a numerical value.                                                                                          |
|             |                                   |                                                                                                                                                                                           |
|             | Continuum Scale                   | The arrow indicates a continuum between two different possibilities (ex. Low to high, small to large,                                                                                     |

|                                 |                                         |                                                                                                                  |
|---------------------------------|-----------------------------------------|------------------------------------------------------------------------------------------------------------------|
|                                 |                                         | temp)                                                                                                            |
|                                 | Angle                                   | Indication of an angle in degrees                                                                                |
|                                 | Trendline on a Graph                    | Indication that there is a trend with the data                                                                   |
|                                 | Emphasis on a Point in a Gene           | The arrow emphasizes what is important to look at on a gene                                                      |
|                                 | Emphasis on a Point                     | The arrow emphasizes what is important to look at                                                                |
|                                 | Specific Examples of the Topic          | Indication that example(s) is/are given for the general topic                                                    |
|                                 | Explanation                             | The tail of the arrow is explained at the point of the arrow                                                     |
| interaction/dissociation        | Binding of a Substance                  | The substance is at the tail of the arrow and the point of the arrow indicates where the substance will bind     |
| external action applied         | Addition of a Reactant to an Experiment | The substance is at the tail of the arrow and the point of the arrow indicates where the substance will be added |
|                                 | Force                                   | Indication that an external force causes a change in the motion of the object such as pressure                   |
|                                 | Step in a Protocol                      | Indicates the next step in a protocol                                                                            |
|                                 | Stimulus                                | Indicates a stimulus is added to a subject/object                                                                |
|                                 | Sampling                                | Taking a sample from a pool                                                                                      |
| change in scale                 | Zooming                                 | The arrow indicates that zooming in/out has occurred                                                             |
| directionality within an object | Body Axes                               | Arrows are used to indicate the directionality and symmetry of the body/object                                   |
|                                 | Polarity of Macromolecules              | The arrow indicates 5' to 3', N to C, etc.                                                                       |
|                                 | Beta Pleated Sheets                     | Arrows that are used to represent beta pleated sheets and their directionality                                   |
| progression through a system    | Directionality                          | Something acts on/within a system with a particular directionality (e.g. evaporation moves toward the air)       |
|                                 | Signaling                               | The arrow indicates the flow/direction of the signal                                                             |

|              |                                     |                                                                                                                                                                                                                                                                                                    |
|--------------|-------------------------------------|----------------------------------------------------------------------------------------------------------------------------------------------------------------------------------------------------------------------------------------------------------------------------------------------------|
|              | Process                             | The arrow is a generalized representation that a process has occurred. Process is defined as unable to stop in the middle and get a product/intermediate according to the figure at hand. Pathway is defined as being able to stop at steps and have a product/intermediate in the figure at hand. |
|              | Electron Transport Chain            | A generalized representation of the electron transport chain                                                                                                                                                                                                                                       |
|              | Feedback Control                    | When a product is used to control the production of the product. When a substance is used to control/regulate a process.                                                                                                                                                                           |
|              | Cycle                               | A generalized representation of a cycle (no intermediates/chemistry shown)                                                                                                                                                                                                                         |
|              | Step in a Cycle                     | The arrow indicates the next step in a cycle                                                                                                                                                                                                                                                       |
|              | Multiple Steps in One               | The arrow represents many steps/processes/pathways taking place to reach a final product. Basically it skips a lot of the "middle" part to get to the final product. This is different from "process" because "process" deals with one process such as one arrow to denote "glycolysis".           |
| input/output | Entry into a Cycle                  | Indication that a substance is entering into a cycle from the outside                                                                                                                                                                                                                              |
|              | Products of a General Cycle         | Products that are coming from a generalized representation of a cycle                                                                                                                                                                                                                              |
|              | Step in a Cycle with a Side Product | Indication of a side product being produced and leaving the cycle in one of the steps                                                                                                                                                                                                              |
|              | Heat Energy                         | The energy being produced is heat                                                                                                                                                                                                                                                                  |
|              | Light energy Added                  | The source of energy is in the form of light                                                                                                                                                                                                                                                       |
|              | Other Energies Released             | The energy that is being produced/used that is NOT light or heat (ex. Kinetic, mechanical energies, fluorescence)                                                                                                                                                                                  |



|  |                           |                                                                                                                                                                                                                                                                                                                                      |
|--|---------------------------|--------------------------------------------------------------------------------------------------------------------------------------------------------------------------------------------------------------------------------------------------------------------------------------------------------------------------------------|
|  | Entry into a Process      | Indication that a substance is entering into a process from the outside                                                                                                                                                                                                                                                              |
|  | Side Product of a Process | A product that is produced and leaves the process, but is not the "main" product according to the figure. Process is defined as unable to stop in the middle and get a product/intermediate according to the figure at hand. Pathway is defined as being able to stop at steps and have a product/intermediate in the figure at hand |
